# Supplementary material
Source: publisher figshare collection journal article supplement (https://acs.figshare.com/ndownloader/files/4648954)
Supplement: Supplementary file 1 [file 4648954]

# Understanding the Role of Nanoparticle Synthesis on Their Underlying Electrocatalytic Activity

*Han-Pu Liang,<sup>†\*</sup> Timothy G. J. Jones,<sup>†</sup> Nathan S. Lawrence,<sup>†\*</sup> Li Jiang<sup>‡</sup> and  
Jonathan S. Barnard<sup>§</sup>*

<sup>†</sup>Schlumberger Cambridge Research, High Cross, Madingley Road, Cambridge, CB3  
0EL, UK, <sup>‡</sup>Schlumberger-Doll Research, 1 Hampshire Street, Cambridge,  
Massachusetts 02139,

<sup>§</sup>Department of Materials Science and Metallurgy, University of Cambridge, Pembroke  
Street, Cambridge CB2 3QZ, UK

**RECEIVED DATE (to be automatically inserted after your manuscript is accepted  
if required according to the journal that you are submitting paper to)**

\* To whom correspondence should be addressed. Fax: +44 1223467004

E-mail: [hliang@cambridge.oilfield.slb.com](mailto:hliang@cambridge.oilfield.slb.com) [nlawrenc@cambridge.oilfield.slb.com](mailto:nlawrenc@cambridge.oilfield.slb.com)

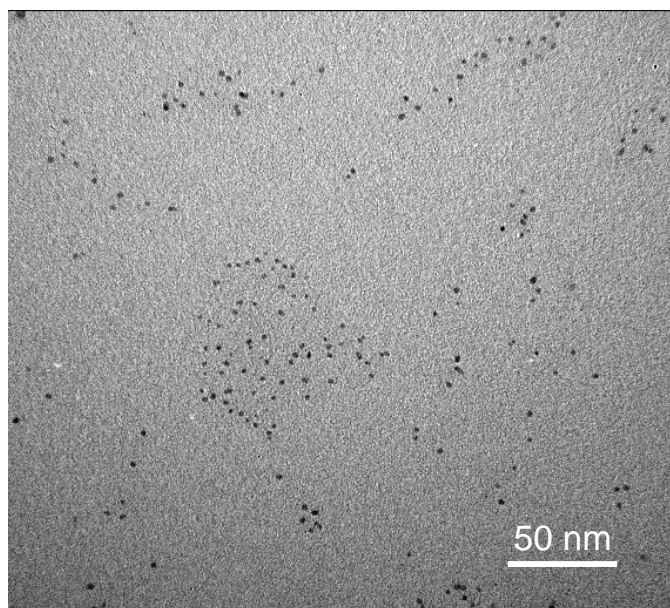

Figure S1: Typical TEM image of Pt nanoparticles using PVP as stabilizing agent

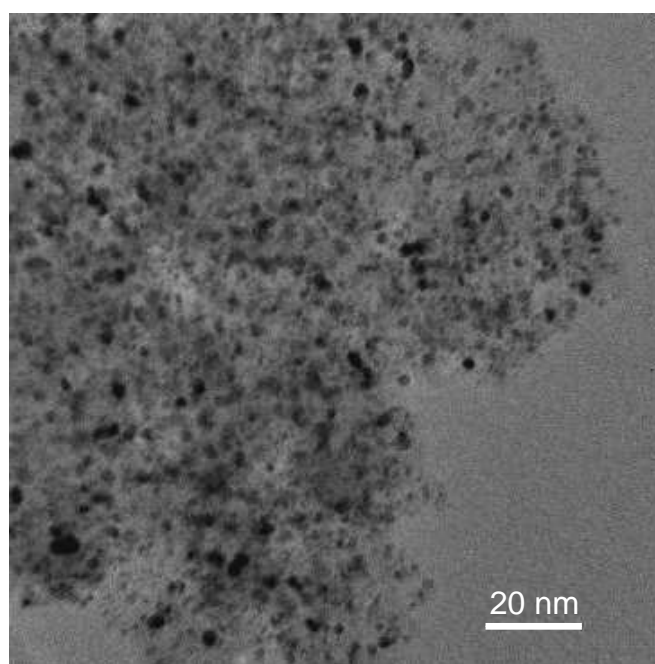

Figure S2: Typical TEM image of unprotected Pt nanoparticles

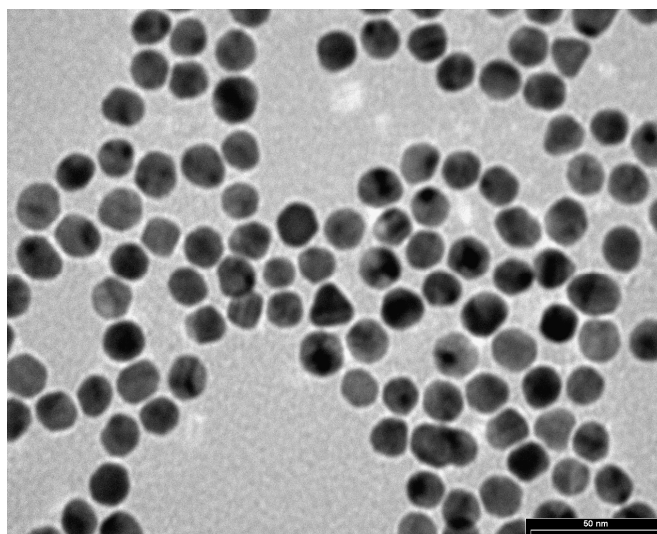

Figure S3: Typical TEM image of Au nanoparticles.

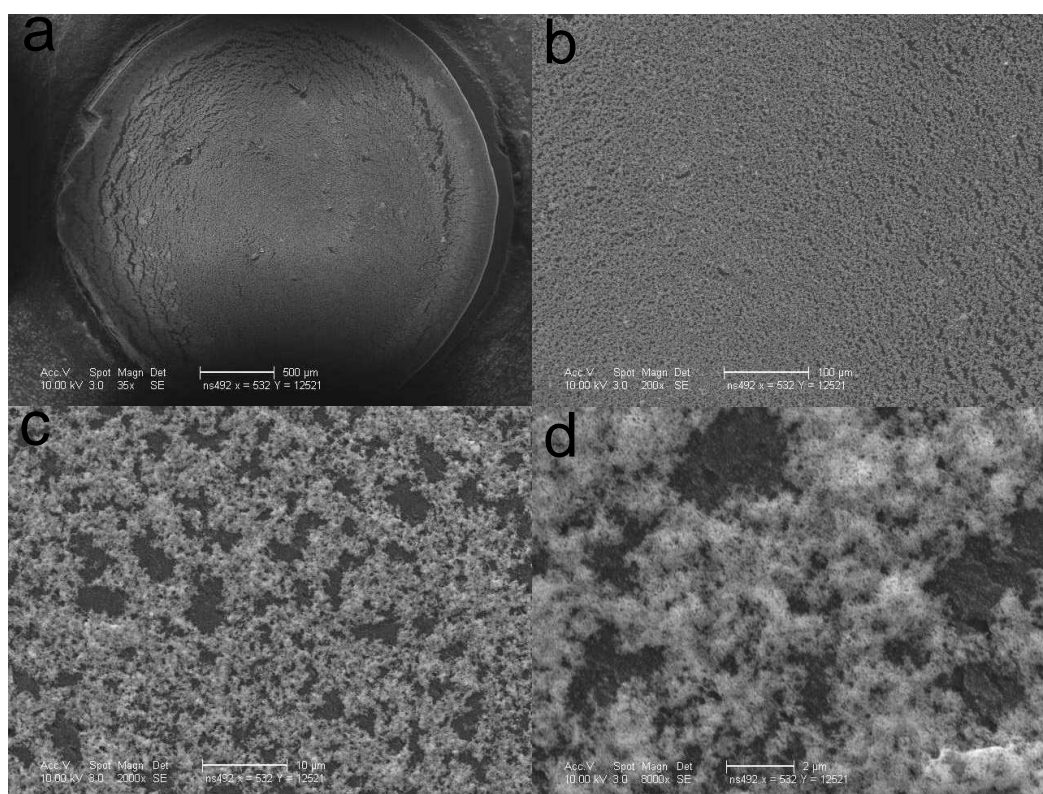

Figure S4 Typical SEM images at different magnification of  $\text{Au}_{25}\text{Pt}_{75}$  nanoparticles placed on the glass carbon electrode surface. Pt loading was 20 nmol.

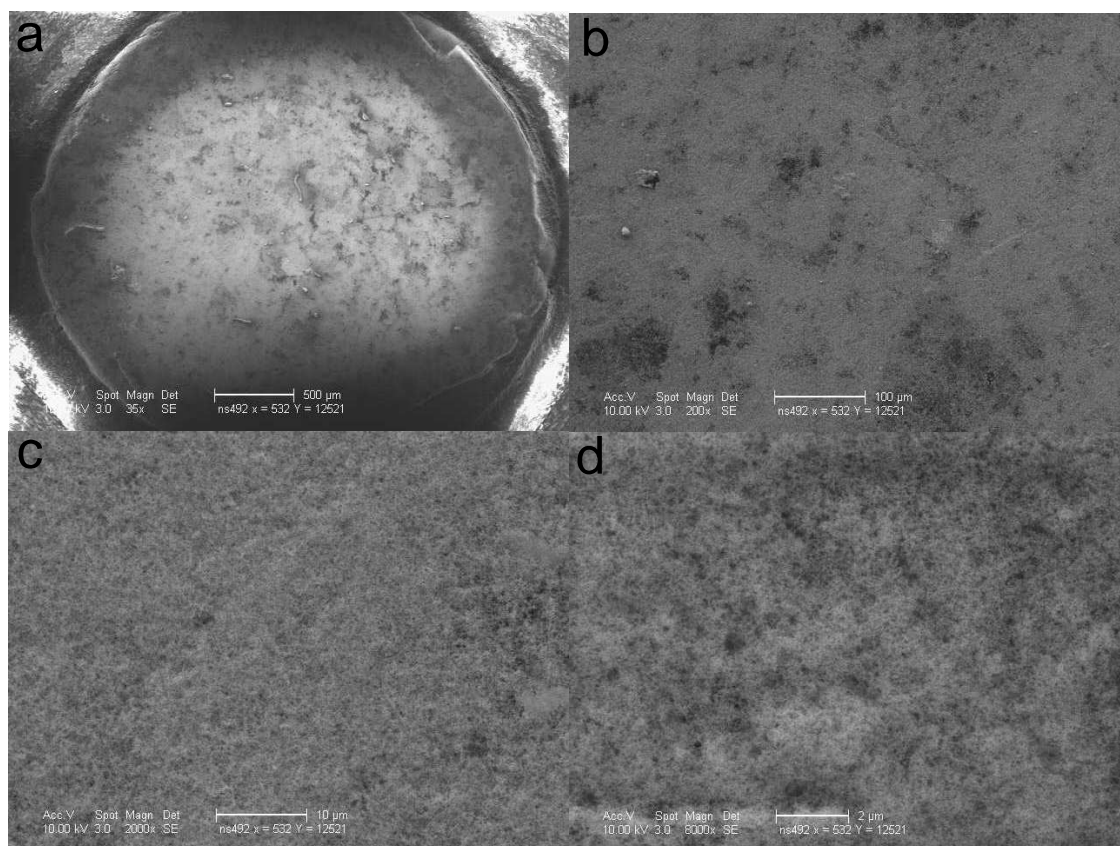

Figure S5 Typical SEM images at different magnification of  $\text{Au}_{57}\text{Pt}_{43}$  nanoparticles placed on the glass carbon electrode surface. Pt loading was 20 nmol.
